# Supplementary material
Source: PubMed Central journal article supplement (PMC5858482)
Supplement: ba015230-suppl1.pdf [file ba015230-suppl1.pdf]

## Supplementary Figure 1

**A**

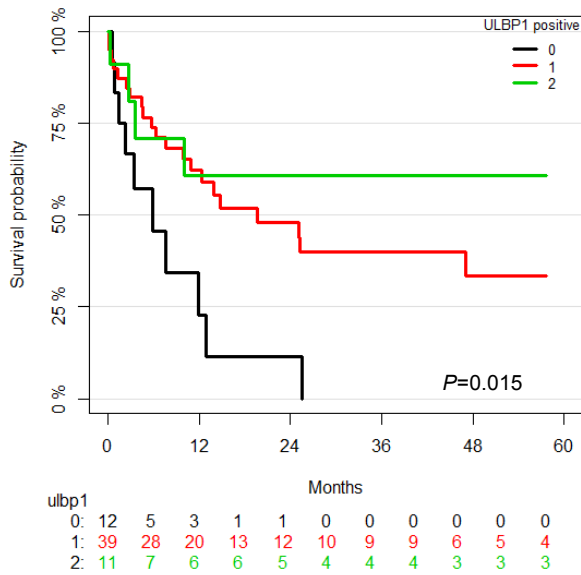

**B**

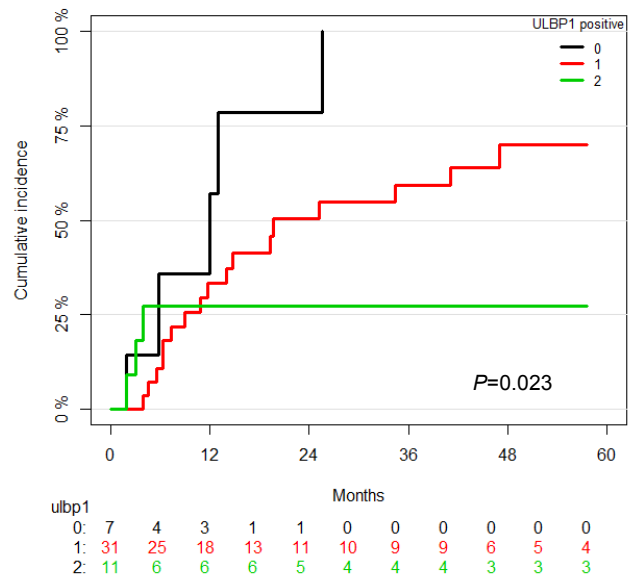

**C**

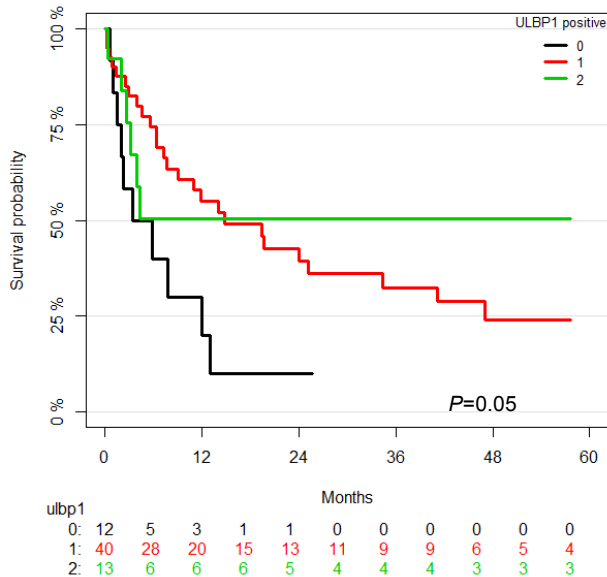

### Supplementary Figure 1. ULBP1 expression correlates with better outcome in a stepwise manner.

Kaplan–Meier estimates of overall survival (A), cumulative incidence of relapse (B) and relapse free survival (C), according to ULBP1 relative fluorescence intensity score: patients belonging to score 0 (non expressors), 1 (low expressors) and 2 (high expressors) are represented by black, red and green lines, respectively.  $P$  values are shown.

## Supplementary Figure 2

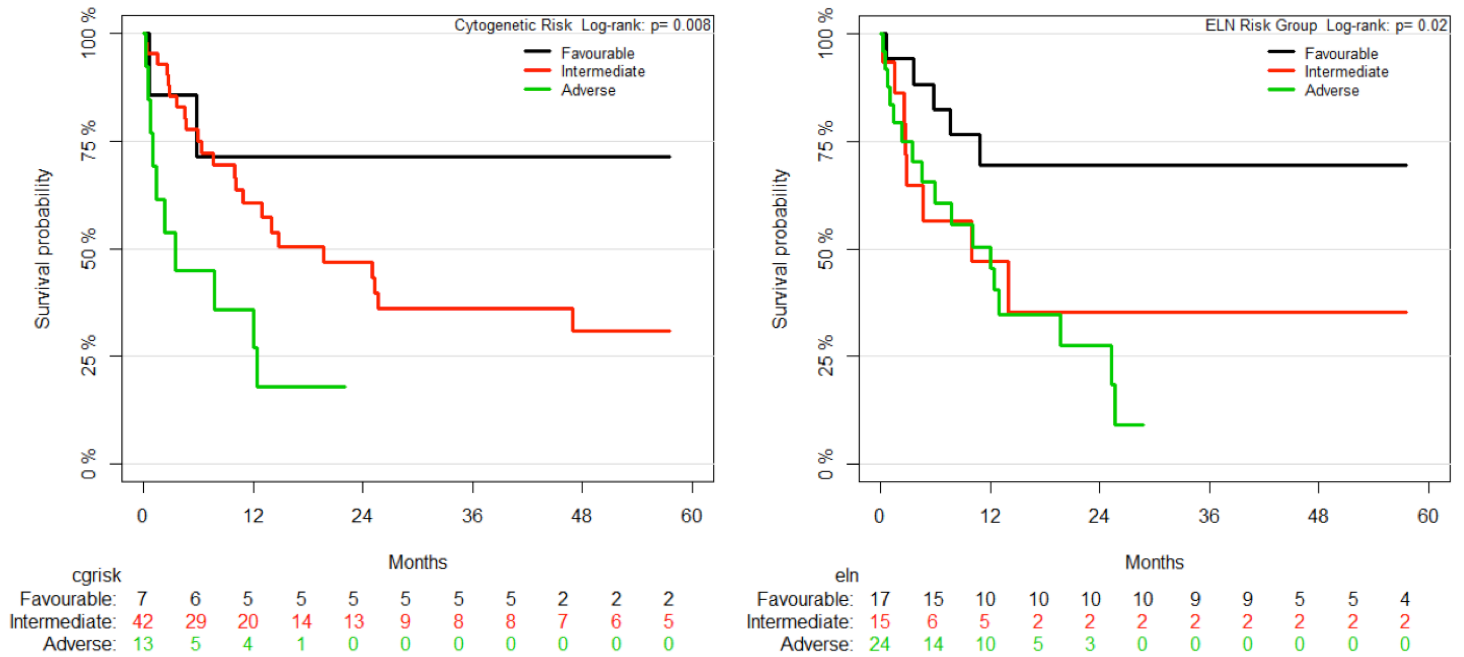

**Supplementary Figure 2. Overall survival of our patient population according to cytogenetic and molecular risk.** Kaplan–Meier estimates of overall survival in our cohort of patients, according to cytogenetic risk (left panel) and ELN classification (right panel): patients belonging to favorable, intermediate and adverse risk groups are represented by black, red and green lines, respectively. *P* values are shown.

**Supplementary Table 1**

|                  | OS   |             |          | RFS  |             |          | CIR  |             |          |
|------------------|------|-------------|----------|------|-------------|----------|------|-------------|----------|
|                  | HR   | 95% CI      | <i>P</i> | HR   | 95% CI      | <i>P</i> | HR   | 95% CI      | <i>P</i> |
| <b>MICA</b>      | 0.65 | 0.291-1.442 | 0.288    | 0.60 | 0.299-1.196 | 0.146    | 0.52 | 0.217-1.25  | 0.140    |
| <b>MICB</b>      | 0.79 | 0.403-1.564 | 0.505    | 0.79 | 0.423-1.474 | 0.458    | 0.61 | 0.273-1.34  | 0.220    |
| <b>CD155</b>     | 0.76 | 0.267-2.148 | 0.601    | 0.77 | 0.301-1.957 | 0.580    | 0.78 | 0.23-2.66   | 0.690    |
| <b>CD112</b>     | 0.78 | 0.336-1.796 | 0.555    | 0.74 | 0.350-1.542 | 0.415    | 0.52 | 0.196-1.4   | 0.200    |
| <b>ULBP1</b>     | 0.34 | 0.161-0.732 | 0.006    | 0.42 | 0.200-0.865 | 0.019    | 0.35 | 0.169-0.726 | 0.005    |
| <b>ULBP2/5/6</b> | 0.76 | 0.387-1.496 | 0.428    | 0.87 | 0.473-1.601 | 0.655    | 0.52 | 0.23-1.18   | 0.120    |
| <b>HLA-1</b>     | 1.36 | 0.666-2.757 | 0.402    | 1.18 | 0.607-2.31  | 0.620    | 1.61 | 0.679-3.81  | 0.280    |
| <b>PD-L1</b>     | 1.06 | 0.521-2.166 | 0.867    | 0.90 | 0.459-1.75  | 0.749    | 0.39 | 0.157-0.977 | 0.044    |
| <b>PD-L2</b>     | 1.14 | 0.515-2.506 | 0.752    | 1.27 | 0.605-2.662 | 0.528    | 2.01 | 0.842-4.79  | 0.120    |

**Supplementary Table 1. Univariate correlation between the expression of each individual NK receptor ligand and patient outcome.** OS indicates overall survival, RFS relapse free survival, CIR cumulative incidence of relapse, HR hazard ratio, CI confidence interval, *P* P value.
